# Supplementary material
Source: PubMed Central journal article supplement (PMC5034215)
Supplement: HESR-51-1960-s002.pdf [file HESR-51-1960-s002.pdf]

## **Appendix SA2: List of variables included in different matching methods (all variables are based on the year 2004)**

**1. ELSID matching:** mandatory variables = region, age group, gender, most expensive pharmacy cost group (PCG), number of PCGs, number of diagnostic cost groups (DCGs)); optional variables: number of sick days, insurance status

**2. modified ELSID matching (10 most predictive variables selected by general boosted regression):** diabetes medication, age group, region, number of quarters with an HbA1C-measurement, overall costs, number of outpatient consultations, diabetes diagnosis without complications, prescription costs, sick days, costs for home health care, therapeutic aids and appliances.

### **3. Variables included in the data set 'sel var':**

#### **Socio-demographic variables**

Age

Gender

Insurance status: employed member, retired member, family member

Region: North Rhine, Hesse, North Wurttemberg

#### **DXG codes identified by logistic regression model:**

##### Inpatient codes:

sdxc106: Diabetes mellitus type 2 without other clearly defined symptoms

sdxc111: Diabetes mellitus type 1 without complications

sdxc173: Diseases of the oesophagus, but no ulcer or bleeding

sdxc183: Osteomyelitis

sdxc44: Malignant neoplasm of the oesophagus, bronchiae, lungs, or pleura

sdxc451: Emphysema, chronic bronchitis (age > 17)

sdxc60: Malignant neoplasm of the colon

sdxc70: Malignant neoplasm of the kidney or renal pelvis

sdxc92: Neoplasm of unknown origin, not respiratory system, kidney, urinary tract, bladder, skin or central nervous system

##### Outpatient codes:

adxg100: Diabetes mellitus type 2 with complications of the vascular system

adxg101: Diabetes mellitus type 1 with complications of the nervous system

adxg104: Diabetes mellitus type 2 with diabetic ketoacidosis or diabetic coma

adxg106: Diabetes mellitus type 2 with other secondary diseases

adxg108: Diabetes mellitus type 2 with complications of the eye

adxg110: Diabetes mellitus type 2 without complications

adxg111: Diabetes mellitus type 1 without complications

adxg112: Diabetes mellitus type 2 with multiple not specified complications

adxg113: Diabetes mellitus type 1 with multiple not specified complications

adxg117: Diseases of the pituitary gland, thymus, parathyroid or pluriglandular diseases

adxg119: Congenital metabolic disorders

adxg145: Liver cirrhosis

adxg147: Chronic hepatitis, not caused by viral infection

adxg150: Viral hepatitis, without liver coma, not caused by HAV or other not specified agents

adxg173: Diseases of the oesophagus, but not ulcer or bleeding

adxg182: Diseases of the joints with infection

adxg198: Osteoarthritis of the knee

adxg244: Not further specified dementia

adxg264: Episodes of depression, major depressive disorder

adxg306: Paraplegia  
 adxg321: Peripheral neuropathy/myopathy  
 adxg323: Diabetic neuropathy  
 adxg328: Epilepsy (age > 17)  
 adxg33: Metastatic disease of the lymph nodes  
 adxg34: Metastatic disease of the lungs or digestive system  
 adxg35: Metastatic disease of other organs  
 adxg358: Chronic heart failure  
 adxg36: Malignant neoplasm without specified location, or primary malignant neoplasm in several locations  
 adxg362: Post-myocardial infarction syndrome  
 adxg385: Hypertensive heart disease without chronic heart failure  
 adxg387: Primary hypertension  
 adxg389: Secondary hypertension  
 adxg399: Cerebral bleeding  
 adxg400: Occlusion of pre-cerebral or cerebral arteries with cerebral infarction  
 adxg418: Delayed effects of cerebro-vascular disease, not specified  
 adxg428: Atherosclerosis  
 adxg470: Pleurisy, not pleural effusion  
 adxg534: Status after kidney transplantation/ renal complications  
 adxg64: Malignant neoplasm of the breast (age > 44)  
 adxg645: Femur fracture  
 adxg68: Malignant neoplasm of the testicles/ male genitals

#### **ATC codes identified by logistic regression model**

a02b: Medication for peptic ulcer and gastro-oesophageal reflux disease  
 a07f: Antidiarrheal microorganisms  
 a10b: Oral blood glucose lowering drugs  
 b01a: Antithrombotic agents  
 b03x: Other antianemic preparations  
 b05b: I.V. solutions  
 c01a: Cardiac glycosides  
 c03a: Low-ceiling diuretics, Thiazides  
 c03e: Diuretics and potassium-sparing agents in combination  
 c07a: Beta blocking agents  
 c09b: ACE inhibitors, combinations  
 c09d: Angiotensin-II-antagonists, combinations  
 c10a: Lipid modifying agents, plain  
 g03x: Other sex hormones and modulators of the genital system  
 h03c: Iodine therapy  
 h04a: Glycogenolytic hormones  
 j01a: Tetracyclines  
 l01c: Plant alkaloids and other natural products  
 l02b: Hormone antagonists and related agents  
 m01a: Antiinflammatory and antirheumatic products, non-steroids  
 m02a: Topical products for joint and muscular pain  
 m03b: Muscle relaxants, centrally acting agents  
 m05b: Drugs affecting bone structure and mineralization  
 n04b: Dopaminergic agents  
 n05a: Antipsychotics  
 n05c: Hypnotics and sedatives  
 n06a: Antidepressants  
 r06a: Antihistamines for systemic use  
 s02a: Antiinfectives

v03a: All other therapeutic products  
 v04c: Other diagnostic agents  
 v20: Surgical dressings

**4. Additional variables included in the data set 'all var':**

Hospital costs  
 Prescription costs  
 Home health care costs  
 Costs for therapeutic measures, aids and appliances  
 Overall costs  
 Number of PCGs  
 Number of DCGs  
 Number of sick days  
 Hospital utilization: number of hospital admissions  
 Number of hospital days  
 Outpatient utilization: number of EBM codes on different days (excl. those from laboratories)  
 Ischaemic heart disease: outpatient diagnoses I20-I25  
 Number of prescriptions for therapeutic measures  
 Number of prescriptions for therapeutic aids and appliances  
 Diabetes medication: none, only oral, oral insulin, only insulin (identified through ATC codes A10A/A10B)  
 Number of quarters with Hba1c measurement: EBM code 3722  
 Annual eye examination performed: EBM code 1242  
 Diabetes diagnosis without complications: outpatient diagnoses ICD10 E10-E14.9  
 Diabetes diagnosis with multiple complications: outpatient diagnoses ICD10 E10-E14.7  
 Diabetes complications related to the eye: outpatient diagnoses ICD10 E10-E14.3, H35 or H36  
 Ketoacidosis: outpatient diagnoses ICD10 E10-E14.1  
 Hypoglycaemia: outpatient diagnoses ICD10 E10-E14.0 or E15  
 Neuropathy: outpatient diagnoses ICD10 E10-E14.4, G59 or G63  
 Renal disease: outpatient diagnoses ICD10 E10-E14.2 or N18  
 Complications of the vascular system: outpatient diagnoses ICD10 E10-E14.5  
 Adipositas: outpatient diagnoses ICD10 E66  
 Hypertension: outpatient diagnoses ICD10 I10-I15  
 COPD/Asthma: outpatient diagnoses ICD10 J40-J47  
 Depression: outpatient or inpatient diagnoses ICD10 F32 or F33  
 Osteoporosis: outpatient diagnoses ICD10 M80-M82  
 Diseases related to alcohol consumption: inpatient or outpatient diagnoses ICD10 F10 or K70  
 Dementia: inpatient or outpatient diagnoses ICD10 F00-F03 or G30  
 Cancer: outpatient diagnoses ICD10 C1-C98  
 Cancer-related hospital admissions: main inpatient diagnosis ICD10 C1-C98  
 Dialysis: inpatient or outpatient diagnoses ICD10 N180, Z992 or Z49  
 Cerebro-vascular disease: outpatient diagnoses ICD10 I60-I69  
 Blindness: outpatient diagnosis ICD10 H54

### Appendix SA3: Standardized mean differences of all covariates before and after matching

The standardized mean differences for all covariates before matching are plotted on the left of each subplot; the standardized mean differences after matching are plotted on the right. A blue line indicates a decrease in the mean standardized difference after matching, a red line indicates an increase. The solid horizontal black line indicates a standardized mean difference of 0.1.

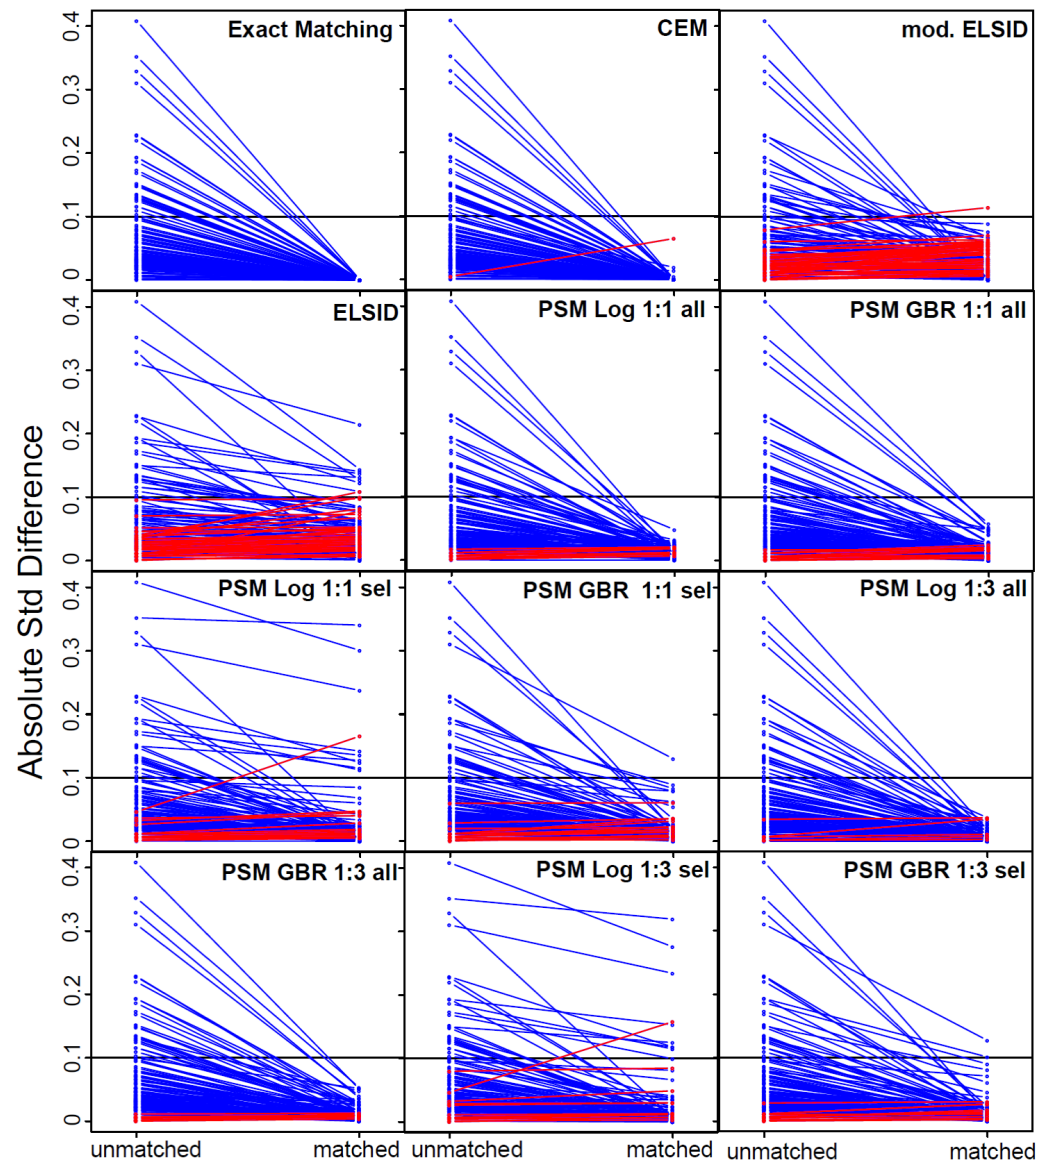

#### Appendix SA4: Table of balance measures before and after the application of different matching techniques

Table - Balance measures

Balance measures before and after the application of different matching techniques; SMD = standardized mean difference; KS = Kolmogorov-Smirnov Statistic.

| Matching Method      | Mean SMD | Max. SMD | Mean KS | Max KS | L <sub>1</sub> |
|----------------------|----------|----------|---------|--------|----------------|
| Before Matching      | 0.6563   | 0.4084   | 0.0209  | 0.2036 | 0.975          |
| Exact Matching       | 0.0000   | 0.0000   | 0.0000  | 0.0000 | 0.000          |
| CEM                  | 0.0007   | 0.0645   | 0.0018  | 0.0842 | 0.404          |
| ELSID matching       | 0.0402   | 0.2142   | 0.0108  | 0.1036 | 0.977          |
| Mod. ELSID matching  | 0.0269   | 0.1141   | 0.0056  | 0.0301 | 0.945          |
| PSM LogR all var 1:1 | 0.0112   | 0.0477   | 0.0040  | 0.0599 | 0.982          |
| PSM GBR all var 1:1  | 0.0131   | 0.0579   | 0.0038  | 0.0309 | 0.967          |
| PSM LogR sel var 1:1 | 0.0243   | 0.3405   | 0.0088  | 0.1646 | 0.978          |
| PSM GBR sel var 1:1  | 0.0147   | 0.1297   | 0.0047  | 0.0627 | 0.974          |
| PSM LogR all var 1:3 | 0.0068   | 0.0371   | 0.0032  | 0.0608 | 0.977          |
| PSM GBR all var 1:3  | 0.0096   | 0.0532   | 0.0028  | 0.0257 | 0.965          |
| PSM LogR sel var 1:3 | 0.0218   | 0.3195   | 0.0079  | 0.1545 | 0.978          |
| PSM GBR sel var 1:3  | 0.0121   | 0.1272   | 0.0039  | 0.0629 | 0.971          |

#### Appendix SA5: Patient selection

##### Selection of patients into the German DMP program:

Enrolment of patients into the German disease management program is optional. The official requirements for enrolment are:

- An assured diagnosis of type 2 diabetes or treatment with diabetes-specific medication
- Ability and willingness of the patient to actively participate in the program and attend patient training sessions
- Expectation for improvement of quality of life or life expectancy

##### Selection of type 2 diabetic patients in insurance routine data set:

Since ICD10 codes in insurance routine data sets are known to have low validity, especially regarding the third digit, we used a combination of inpatient and outpatient diagnosis codes, outbilling patient codes ('EBM' codes), prescription data (ATC codes) and hospital procedure and billing codes ('OPS' and 'DRG') to identify patients with type 2 diabetes:

In a first step we selected patients with at least two ICD-10 outpatient and/or one inpatient diagnoses E10-E12 or E14 in the years 2004-2006 (with at least one

diagnosis in 2005) and/or at least one prescription for antidiabetic drugs in the year 2005 (ATC codes A10A or A10B).

In a second step, we excluded patients with type 1 diabetes by selecting all patients with at least one ICD-10 in- or outpatient diagnosis E10 without a contradictory type 2 diabetes diagnosis (E11). In the case of inconsistent diagnoses, inpatient diagnoses were considered more valid than outpatient diagnoses. In order to exclude patients with gestational diabetes, all women with a pregnancy in 2005 (identified through an inpatient DRG O01-O05, O40, O60-O65 and/or an inpatient billing code 5-72 – 5-75 or 9-26 and/or an outpatient billing code (EBM) 32007 and/or an in-/outpatient ICD-10 diagnosis O10-O99 or Z34-35) were removed from the sample. Finally, we also excluded all patients who died or left the insurance fund in 2005.
